# Supplementary material for: Study on the therapeutic effect and some immune factors by methotrexate modified superparamagnetic nanoparticles in rat mammary tumors
Source: Royal Society of Chemistry journal article supplement (doi:10.1039/d4na00295d), 2024-11-26
Supplement: d4na00295d3.pdf [file d4na00295d3.pdf]

## Supplementary material

### **Study on the Therapeutic Effect and Some Immune factors by Methotrexate Modified Superparamagnetic Nanoparticles in Rat Mammary Tumors**

Li Huang,<sup>†a</sup> Xing Zhao,<sup>†b</sup> Jun Zhang,<sup>†c</sup> Jiquan Zhang,<sup>d</sup> Weike Liao,<sup>d</sup> Yanhua Fan,<sup>d</sup>  
Jintian Tang,<sup>\*e</sup> Zhixu He,<sup>b</sup> Fuping Gao<sup>e</sup> and Weiwei Ouyang<sup>\*a</sup>

a Department of Thoracic Oncology, the Affiliated Hospital of Guizhou Medical University and the Affiliated of Cancer Hospital of Guizhou Medical University, Guiyang550004, China;

b Stem Cell and Tissue Engineering Research Center, Guizhou Medical University, Guiyang 550004, China;

c Department of Pathology, the Affiliated Hospital of Guizhou Medical University and the Affiliated of Cancer Hospital of Guizhou Medical University, Guiyang 550004, China;

d Guizhou Provincial Engineering Technology Research Center for Chemical Drug R&D, Guizhou Medical University, Guiyang 550004, China;

e Key Laboratory of Particle and Radiation Imaging, Ministry of Education, Institute of Medical Physics and Engineering, Department of Engineering Physics, Tsinghua

University, Beijing 100083, China.

Corresponding Author

\* Weiwei Ouyang – Department of Thoracic Oncology, the Affiliated Hospital of Guizhou Medical University and the Affiliated of Cancer Hospital of Guizhou Medical University, Guiyang550004, China

\* Jintian Tang

Phone:+86 851-86513076; Email: : ouyangww103173@163.com;

†Xing Zhao and Jun Zhang contributed equally to this paper

## Table of Contents

|                        |   |
|------------------------|---|
| <b>Materials</b> ..... | 4 |
| <b>Figure S1</b> ..... | 5 |
| <b>Table S1</b> .....  | 6 |

## Materials

Ferric chloride hexahydrate ( $\text{FeCl}_3 \cdot 6\text{H}_2\text{O}$  > 99%), ferrous chloride tetrahydrate ( $\text{FeCl}_2 \cdot 4\text{H}_2\text{O}$ ), polyethylenimine (PEI, Mw: 25,000), MTX, 1-ethyl-3-[3-(dimethylamino)propyl] carbodiimide (EDC), N-hydroxysuccinimide (NHS) and ammonium hydroxide (25 wt.%  $\text{NH}_3$  in water) obtained from Sigma.

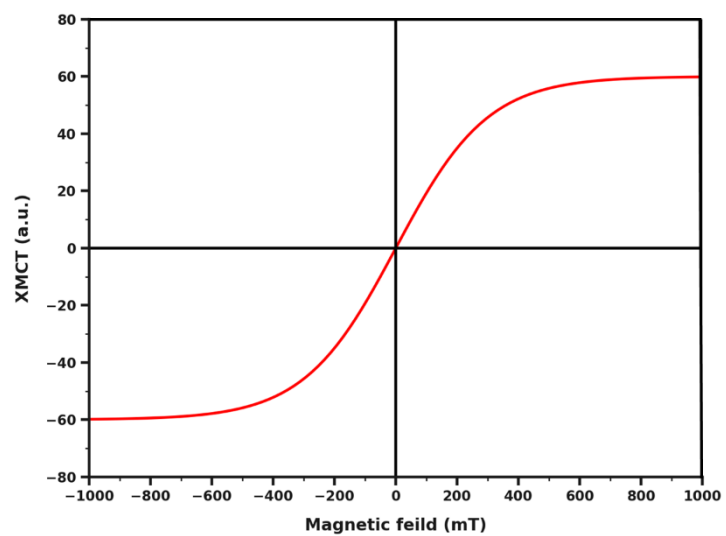

**Figure S1** The magnetization curve of MTX-modified magnetic nanoparticles.

**Table S1. Grouping Information for 201 Rats**

| Groups        | Quantity | Magnetic Particles | Whether to enter the magnetic field | Number of times for entering the magnetic field | Thermotherapy temperature (°C) | Thermotherapy time(min) |
|---------------|----------|--------------------|-------------------------------------|-------------------------------------------------|--------------------------------|-------------------------|
| 47TC          | 24       | MTX                | Yes                                 | 1                                               | 47                             | 30                      |
| 47T           | 24       | PEI                | Yes                                 | 1                                               | 47                             | 30                      |
| 42TC          | 21       | MTX                | Yes                                 | 1                                               | 42                             | 60                      |
| 42T           | 21       | PEI                | Yes                                 | 1                                               | 42                             | 60                      |
| Repeated 42TC | 12       | MTX                | Yes                                 | 2-5 times, interval of 72 h                     | 42                             | 60                      |
| Repeated 42T  | 12       | PEI                | Yes                                 | 2-5 times, interval of 72 h                     | 42                             | 60                      |
| MFC           | 16       | MTX                | No                                  | 0                                               |                                |                         |
| C             | 21       | None               | No                                  | 0                                               |                                |                         |
| M             | 12       | None               | Yes                                 | 1                                               |                                | 30                      |
| MF            | 12       | PEI                | No                                  | 0                                               |                                |                         |
| MTX           | 16       | 20 mg/kg free MTX  | No                                  | 0                                               |                                |                         |
| Normal        | 10       | None               | No                                  | 0                                               |                                |                         |
