# Supplementary material for: Study on the therapeutic effect and some immune factors by methotrexate modified superparamagnetic nanoparticles in rat mammary tumors
Source: Royal Society of Chemistry journal article supplement (doi:10.1039/d4na00295d), 2024-11-26
Supplement: d4na00295d4.pdf [file d4na00295d4.pdf]

**Table S1. Grouping Information for 201 Rats**

| Groups        | Quantity | Magnetic Particles | Whether to enter the magnetic field | Number of times for entering the magnetic field | Thermotherapy temperature (°C) | Thermotherapy time(min) |
|---------------|----------|--------------------|-------------------------------------|-------------------------------------------------|--------------------------------|-------------------------|
| 47TC          | 24       | MTX                | Yes                                 | 1                                               | 47                             | 30                      |
| 47T           | 24       | PEI                | Yes                                 | 1                                               | 47                             | 30                      |
| 42TC          | 21       | MTX                | Yes                                 | 1                                               | 42                             | 60                      |
| 42T           | 21       | PEI                | Yes                                 | 1                                               | 42                             | 60                      |
| Repeated 42TC | 12       | MTX                | Yes                                 | 2-5 times, interval of 72 h                     | 42                             | 60                      |
| Repeated 42T  | 12       | PEI                | Yes                                 | 2-5 times, interval of 72 h                     | 42                             | 60                      |
| MFC           | 16       | MTX                | No                                  | 0                                               |                                |                         |
| C             | 21       | None               | No                                  | 0                                               |                                |                         |
| M             | 12       | None               | Yes                                 | 1                                               |                                | 30                      |
| MF            | 12       | PEI                | No                                  | 0                                               |                                |                         |
| MTX           | 16       | 20 mg/kg free MTX  | No                                  | 0                                               |                                |                         |
| Normal        | 10       | None               | No                                  | 0                                               |                                |                         |
