# Supplementary figures and images for: Study on the therapeutic effect and some immune factors by methotrexate modified superparamagnetic nanoparticles in rat mammary tumors
Source: Royal Society of Chemistry journal article supplement (doi:10.1039/d4na00295d), 2024-11-26

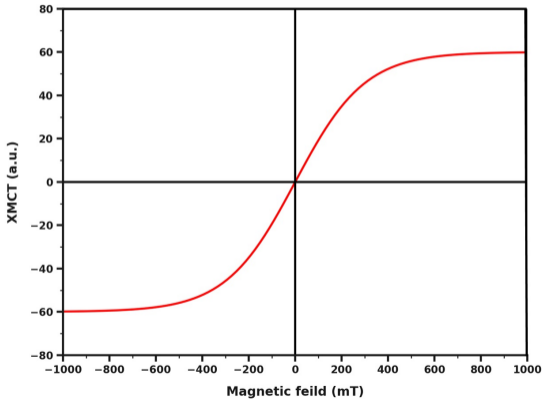

Supplement: d4na00295d2.pdf [file d4na00295d2.pdf]
